# Supplementary material for: Defining conservation units in a stocking-induced genetic melting pot: unraveling native and multiple exotic genetic imprints of recent and historical secondary contact in Adriatic grayling
Source: PubMed Central journal article supplement (PMC4020691; doi:10.1002/ece3.931), 2014-03-18
Supplement: ece30004-1313-sd1.pdf [file ece30004-1313-sd1.pdf]

## Supporting information

**Table S1** Model checking for the alternative scenarios of colonisation and gene-flow tested in the two steps ABC analysis. For each Summary statistics (S), the probability  $\text{Prob}(S_{\text{simulated}} < S_{\text{observed}})$  was computed from 10,000 data sets simulated from the posterior distributions of parameters obtained under a given scenario. Corresponding tail-area probabilities (p-values) of each summary statistic can be obtained as  $\text{Prob}(S_{\text{simulated}} < S_{\text{observed}})$  and  $1.0 - \text{Prob}(S_{\text{simulated}} < S_{\text{observed}})$  for  $\text{Prob}(S_{\text{simulated}} < S_{\text{observed}}) \leq 0.5$  and  $> 0.5$ , respectively (Gelman *et al.* 1995). Summary statistics, in both first and second step, are divided into ‘used’ to discriminate among scenarios and compute parameter posterior distributions (a), and ‘not used’ for model selection but used in model checking (b). Significant tail-area probabilities, after applying the false discovery rate correction method (FDR) implemented in the software QVALUE (Storey 2002), are marked with asterisks (\*, \*\*, \*\*\* = tail-area probability  $< 0.05$ ,  $< 0.01$  and  $< 0.001$ , respectively). Populations codes: SES = Sesia; DRA = Drava; ISA = Isarco; ADI = Adige. Summary statistics codes: NAL<sub>i</sub> = mean number of alleles in population i; MGW<sub>i</sub> = mean ratio of the number of alleles over the range of allele sizes (Garza & Williamson 2001); FST<sub>i-j</sub> = F<sub>ST</sub> value between populations i and j (Weir & Cockerham 1984); LIK<sub>i-j</sub> = mean individual assignment likelihoods of population i assigned to population j (Pascual *et al.* 2007); V2P<sub>i-j</sub> = mean variance of the absolute allelic size pooling samples from populations i and j; DAS<sub>i-j</sub> = shared allele distance between populations i and j (Jin & Chakraborty 1994); HET<sub>i</sub> = mean expected heterozygosity in population i (Nei 1987); VAR<sub>i</sub> = mean allelic size variance in population i; DM2<sub>i-j</sub> = delta mu squared (Goldstein *et al.* 1995); N2P<sub>i-j</sub> = mean number of alleles pooling samples from populations i and j; H2P<sub>i-j</sub> = mean expected heterozygosity pooling samples from populations i and j.

**Table S1**

| (a)                                                                                                   | Summary statistics | observed value | A                       | B                       | C                       | A <sub>recent</sub>     | A <sub>historical</sub> | A <sub>ancient</sub>    |
|-------------------------------------------------------------------------------------------------------|--------------------|----------------|-------------------------|-------------------------|-------------------------|-------------------------|-------------------------|-------------------------|
| Posterior probability [C.I.]                                                                          |                    |                | 0.874<br>[0.804; 0.945] | 0.007<br>[0.002; 0.012] | 0.119<br>[0.051; 0.186] | 0.000<br>[0.000; 0.000] | 0.995<br>[0.991; 0.999] | 0.005<br>[0.001; 0.009] |
|                                                                                                       | NAL_SES            | 3.750          | 0.738                   | 0.740                   | 0.739                   | 0.739                   | 0.739                   | 0.739                   |
|                                                                                                       | NAL_DRA            | 3.500          | 0.600                   | 0.600                   | 0.600                   | 0.599                   | 0.599                   | 0.599                   |
|                                                                                                       | NAL_ISA            | 3.917          | 0.693                   | 0.685                   | 0.695                   | 0.718                   | 0.746                   | 0.696                   |
|                                                                                                       | NAL_ADI            | 5.000          | 0.861                   | 0.875                   | 0.875                   | 0.506                   | 0.641                   | 0.820                   |
|                                                                                                       | MGW_SES            | 0.410          | 0.008 (*)               | 0.008 (*)               | 0.008 (*)               | 0.008 (*)               | 0.008 (*)               | 0.008 (*)               |
|                                                                                                       | MGW_DRA            | 0.527          | 0.055                   | 0.056                   | 0.056                   | 0.056                   | 0.055                   | 0.056                   |
|                                                                                                       | MGW_ISA            | 0.568          | 0.094                   | 0.154                   | 0.093                   | 0.099                   | 0.103                   | 0.092                   |
|                                                                                                       | MGW_ADI            | 0.436          | 0.090                   | 0.011 (*)               | 0.011 (*)               | 0.909                   | 0.891                   | 0.328                   |
|                                                                                                       | FST_SES-DRA        | 0.607          | 0.419                   | 0.419                   | 0.418                   | 0.419                   | 0.419                   | 0.419                   |
|                                                                                                       | FST_SES-ISA        | 0.595          | 0.392                   | 0.408                   | 0.390                   | 0.387                   | 0.359                   | 0.389                   |
|                                                                                                       | FST_SES-ADI        | 0.311          | 0.005 (*)               | 0.005 (*)               | 0.006 (*)               | 0.041                   | 0.025                   | 0.008 (*)               |
|                                                                                                       | FST_DRA-ISA        | 0.109          | 0.001 (**)              | 0.001 (*)               | 0.006 (*)               | 0.984                   | 0.457                   | 0.001 (*)               |
|                                                                                                       | FST_DRA-ADI        | 0.469          | 0.172                   | 0.132                   | 0.132                   | 0.793                   | 0.735                   | 0.282                   |
|                                                                                                       | FST_ISA-ADI        | 0.446          | 0.184                   | 0.154                   | 0.097                   | 0.768                   | 0.703                   | 0.332                   |
|                                                                                                       | LIK_SES-DRA        | 4.068          | 0.057                   | 0.053                   | 0.053                   | 0.085                   | 0.080                   | 0.070                   |
|                                                                                                       | LIK_SES-ISA        | 4.078          | 0.065                   | 0.123                   | 0.060                   | 0.095                   | 0.087                   | 0.079                   |
|                                                                                                       | LIK_SES-ADI        | 2.816          | 0.002 (*)               | 0.004 (*)               | 0.010 (*)               | 0.008 (*)               | 0.007 (*)               | 0.003 (*)               |
| Summary statistics used to discriminate among scenarios and compute parameter posterior distributions | LIK_DRA-SES        | 3.689          | 0.109                   | 0.102                   | 0.101                   | 0.171                   | 0.157                   | 0.133                   |
|                                                                                                       | LIK_DRA-ISA        | 0.809          | 0.001 (*)               | 0.003 (*)               | 0.014 (*)               | 0.833                   | 0.498                   | 0.020                   |
|                                                                                                       | LIK_DRA-ADI        | 2.364          | 0.008 (**)              | 0.000 (***)             | 0.000 (***)             | 0.884                   | 0.750                   | 0.099                   |
|                                                                                                       | LIK_ISA-SES        | 3.768          | 0.159                   | 0.219                   | 0.147                   | 0.241                   | 0.228                   | 0.190                   |
|                                                                                                       | LIK_ISA-DRA        | 0.833          | 0.001 (*)               | 0.001 (*)               | 0.014 (*)               | 0.871                   | 0.526                   | 0.018                   |
|                                                                                                       | LIK_ISA-ADI        | 2.151          | 0.056                   | 0.021                   | 0.000 (***)             | 0.854                   | 0.749                   | 0.212                   |
|                                                                                                       | LIK_ADI-SES        | 2.755          | 0.004 (*)               | 0.009 (*)               | 0.018                   | 0.005 (*)               | 0.005 (*)               | 0.005 (*)               |
|                                                                                                       | LIK_ADI-DRA        | 3.743          | 0.156                   | 0.010 (*)               | 0.010 (*)               | 0.802                   | 0.776                   | 0.437                   |
|                                                                                                       | LIK_ADI-ISA        | 3.401          | 0.208                   | 0.152                   | 0.001 (*)               | 0.718                   | 0.697                   | 0.462                   |
|                                                                                                       | V2P_SES-DRA        | 25.253         | 0.035                   | 0.035                   | 0.034                   | 0.034                   | 0.035                   | 0.035                   |
| V2P_SES-ISA                                                                                           | 24.029             | 0.028          | 0.122                   | 0.028                   | 0.028                   | 0.029                   | 0.028                   |                         |
| V2P_SES-ADI                                                                                           | 24.245             | 0.124          | 0.310                   | 0.331                   | 0.039                   | 0.047                   | 0.102                   |                         |
| V2P_DRA-ISA                                                                                           | 4.093              | 0.167          | 0.033                   | 0.254                   | 0.779                   | 0.768                   | 0.477                   |                         |
| V2P_DRA-ADI                                                                                           | 25.104             | 0.266          | 0.024                   | 0.023                   | 0.232                   | 0.247                   | 0.313                   |                         |
| V2P_ISA-ADI                                                                                           | 23.700             | 0.298          | 0.279                   | 0.019                   | 0.213                   | 0.229                   | 0.311                   |                         |
| DAS_SES-DRA                                                                                           | 0.081              | 0.904          | 0.904                   | 0.903                   | 0.904                   | 0.903                   | 0.903                   |                         |
| DAS_SES-ISA                                                                                           | 0.069              | 0.867          | 0.785                   | 0.866                   | 0.866                   | 0.864                   | 0.866                   |                         |
| DAS_SES-ADI                                                                                           | 0.304              | 0.998 (*)      | 0.995 (*)               | 0.990 (*)               | 0.998 (*)               | 0.998 (*)               | 0.997 (*)               |                         |
| DAS_DRA-ISA                                                                                           | 0.608              | 0.996 (*)      | 0.995 (*)               | 0.975                   | 0.433                   | 0.526                   | 0.942                   |                         |
| DAS_DRA-ADI                                                                                           | 0.177              | 0.909          | 0.997 (*)               | 0.997 (*)               | 0.256                   | 0.285                   | 0.679                   |                         |
| DAS_ISA-ADI                                                                                           | 0.187              | 0.788          | 0.852                   | 0.998 (*)               | 0.272                   | 0.282                   | 0.537                   |                         |

**Table S1** (continued)

| (b)                                                                        | Summary statistics | observed value | A                       | B                       | C                       | A <sub>recent</sub>     | A <sub>historical</sub> | A <sub>ancient</sub>    |
|----------------------------------------------------------------------------|--------------------|----------------|-------------------------|-------------------------|-------------------------|-------------------------|-------------------------|-------------------------|
| Posterior probability [C.I.]                                               |                    |                | 0.874<br>[0.804; 0.945] | 0.007<br>[0.002; 0.012] | 0.119<br>[0.051; 0.186] | 0.000<br>[0.000; 0.000] | 0.995<br>[0.991; 0.999] | 0.005<br>[0.001; 0.009] |
|                                                                            | HET_SES            | 0.404          | 0.195                   | 0.400                   | 0.195                   | 0.280                   | 0.210                   | 0.370                   |
|                                                                            | HET_DRA            | 0.336          | 0.270                   | 0.370                   | 0.330                   | 0.435                   | 0.360                   | 0.340                   |
|                                                                            | HET_ISA            | 0.361          | 0.220                   | 0.220                   | 0.350                   | 0.560                   | 0.315                   | 0.310                   |
|                                                                            | HET_ADI            | 0.539          | 0.400                   | 0.620                   | 0.420                   | 0.680                   | 0.310                   | 0.430                   |
|                                                                            | VAR_SES            | 17.281         | 0.940                   | 0.960                   | 0.930                   | 0.940                   | 0.960                   | 0.960                   |
|                                                                            | VAR_DRA            | 3.610          | 0.550                   | 0.570                   | 0.535                   | 0.710                   | 0.540                   | 0.580                   |
|                                                                            | VAR_ISA            | 4.080          | 0.550                   | 0.050                   | 0.580                   | 0.770                   | 0.590                   | 0.595                   |
|                                                                            | VAR_ADI            | 22.199         | 0.170                   | 0.980 (*)               | 0.930                   | 0.130                   | 0.080                   | 0.100                   |
|                                                                            | DM2_SES-DRA        | 75.614         | 0.000 (***)             | 0.000 (***)             | 0.000 (***)             | 0.010 (*)               | 0.010 (*)               | 0.010 (*)               |
|                                                                            | DM2_SES-ISA        | 69.698         | 0.000 (***)             | 0.000 (***)             | 0.000 (***)             | 0.000 (***)             | 0.010 (*)               | 0.000 (***)             |
|                                                                            | DM2_SES-ADI        | 16.574         | 0.120                   | 0.240                   | 0.130                   | 0.190                   | 0.080                   | 0.140                   |
| Summary statistics not used for model selection but used in model checking | DM2_DRA-ISA        | 0.985          | 0.460                   | 0.120                   | 0.730                   | 0.860                   | 0.740                   | 0.360                   |
|                                                                            | DM2_DRA-ADI        | 47.795         | 0.120                   | 0.000 (***)             | 0.000 (***)             | 0.010 (*)               | 0.010 (*)               | 0.040                   |
|                                                                            | DM2_ISA-ADI        | 41.057         | 0.090                   | 0.000 (***)             | 0.000 (***)             | 0.010 (*)               | 0.010 (*)               | 0.030                   |
|                                                                            | N2P_SES-DRA        | 6.500          | 0.320                   | 0.465                   | 0.320                   | 0.395                   | 0.400                   | 0.515                   |
|                                                                            | N2P_SES-ISA        | 6.500          | 0.210                   | 0.375                   | 0.260                   | 0.605                   | 0.270                   | 0.445                   |
|                                                                            | N2P_SES-ADI        | 7.417          | 0.350                   | 0.690                   | 0.440                   | 0.515                   | 0.310                   | 0.490                   |
|                                                                            | N2P_DRA-ISA        | 5.000          | 0.435                   | 0.440                   | 0.615                   | 0.935                   | 0.620                   | 0.590                   |
|                                                                            | N2P_DRA-ADI        | 6.833          | 0.505                   | 0.265                   | 0.175                   | 0.740                   | 0.485                   | 0.565                   |
|                                                                            | N2P_ISA-ADI        | 6.917          | 0.455                   | 0.340                   | 0.130                   | 0.860                   | 0.420                   | 0.550                   |
|                                                                            | H2P_SES-DRA        | 0.606          | 0.125                   | 0.235                   | 0.205                   | 0.250                   | 0.220                   | 0.195                   |
|                                                                            | H2P_SES-ISA        | 0.624          | 0.125                   | 0.135                   | 0.230                   | 0.435                   | 0.195                   | 0.225                   |
|                                                                            | H2P_SES-ADI        | 0.595          | 0.120                   | 0.145                   | 0.080                   | 0.220                   | 0.050                   | 0.155                   |
| H2P_DRA-ISA                                                                | 0.370              | 0.210          | 0.290                   | 0.325                   | 0.520                   | 0.360                   | 0.220                   |                         |
| H2P_DRA-ADI                                                                | 0.632              | 0.315          | 0.065                   | 0.050                   | 0.290                   | 0.205                   | 0.265                   |                         |
| H2P_ISA-ADI                                                                | 0.634              | 0.270          | 0.080                   | 0.040                   | 0.360                   | 0.165                   | 0.240                   |                         |

**Table S2** Prior distribution of temporal, demographic and mutation model parameters used in the two steps of ABC analysis.  $t_n$  (time of split, merge or admixture) is expressed in generations;  $N_x$  (effective population size) is expressed in number of diploid individuals and it was considered independent for each population; the prior distribution of  $N_x$  was chosen according to estimated effective population sizes obtained in Swatdipong *et al.* (2010) and according to our estimates of  $N_e$  obtained with Colony (Wang 2012) (data not shown) and after testing for demographic stability with Bottleneck (Cornuet & Luikart 1997) and M\_P\_val (Garza & Williamson 2001) (no evidence of bottlenecks detected with both softwares, data not shown);  $r_{XtoY}$  (rate of admixture) represents the contribution of a population X to the origin of a new admixed population Y, ranging from 0 to 1;  $\mu_{SSR}$  (mean mutation rate) is expressed in number of mutation per nucleotide per generation;  $P_{SSR}$  is the mean parameter of the geometric distribution of the length in number of repeats of mutation events. According to prior distribution of parameters, we imposed conditions on them ( $t_n$ ) in order to achieve correct scenarios. All the probability distributions of the above parameters were set to Uniform.

| Parameter   | First step                          |                                      |                                     |
|-------------|-------------------------------------|--------------------------------------|-------------------------------------|
|             | A                                   | B                                    | C                                   |
| $t_1$       | 1 – 25,000                          | 1 – 25,000                           | 1 – 25,000                          |
| $t_2$       | 1 – 25,000                          | -                                    | -                                   |
| $t_3$       | 2,500 – 250,000                     | 2,500 – 250,000                      | 2,500 – 250 000                     |
| $t_4$       | 250 001 – 1,250,000                 | 250 001 – 1,250,000                  | 250 001 – 1,250,000                 |
| $N_x$       | 1 – 1,000                           | 1 – 1,000                            | 1 – 1,000                           |
| $r_{XtoY}$  | 0.000 – 1.000                       | 0.000 – 1.000                        | -                                   |
| $\mu_{SSR}$ | $5 \cdot 10^{-5} - 1 \cdot 10^{-3}$ | $5 \cdot 10^{-5} - 1 \times 10^{-3}$ | $5 \cdot 10^{-5} - 1 \cdot 10^{-3}$ |
| $P_{SSR}$   | 0.000 – 0.600                       | 0.000 – 0.600                        | 0.000 – 0.600                       |
| conditions: | $t_1 \leq t_2$ and $t_1 \leq t_3$   | $t_1 \leq t_3$                       | -                                   |

  

| Parameter         | Second step                                               |                                                                       |                                                              |
|-------------------|-----------------------------------------------------------|-----------------------------------------------------------------------|--------------------------------------------------------------|
|                   | A <sub>recent</sub>                                       | A <sub>historical</sub>                                               | A <sub>ancient</sub>                                         |
| $t_{1recent}$     | 1 – 10                                                    | -                                                                     | -                                                            |
| $t_{2recent}$     | 1 – 10                                                    | -                                                                     | -                                                            |
| $t_{1historical}$ | -                                                         | 11 – 200                                                              | -                                                            |
| $t_{2historical}$ | -                                                         | 11 – 200                                                              | -                                                            |
| $t_{1ancient}$    | -                                                         | -                                                                     | 201 – 25,000                                                 |
| $t_{2ancient}$    | -                                                         | -                                                                     | 201 – 25,000                                                 |
| $t_3$             | 2,500 – 250,000                                           | 2,500 – 250,000                                                       | 2,500 – 250,000                                              |
| $t_4$             | 250,001 – 1,250,000                                       | 250,001 – 1,250,000                                                   | 250,001 – 1,250,000                                          |
| $N_x$             | 1 – 1,000                                                 | 1 – 1,000                                                             | 1 – 1,000                                                    |
| $r_{UNStoADI}$    | 0.000 – 1.000                                             | 0.000 – 1.000                                                         | 0.000 – 1.000                                                |
| $\mu_{SSR}$       | $5 \cdot 10^{-5} - 1 \cdot 10^{-3}$                       | $5 \cdot 10^{-5} - 1 \cdot 10^{-3}$                                   | $5 \cdot 10^{-5} - 1 \cdot 10^{-3}$                          |
| $P_{SSR}$         | 0.000 – 0.600                                             | 0.000 – 0.600                                                         | 0.000 – 0.600                                                |
| conditions:       | $t_{1recent} \leq t_{2recent}$ and $t_{1recent} \leq t_3$ | $t_{1historical} \leq t_{2historical}$ and $t_{1historical} \leq t_3$ | $t_{1ancient} \leq t_{2ancient}$ and $t_{1ancient} \leq t_3$ |

**Table S3** Parameter posterior distributions inferred by ABC under the A and  $A_{\text{historical}}$  scenarios, respectively selected in first and second step. Mean, median and mode of the posterior distributions of each demographic, temporal and mutation model parameter are reported, together with their 90% and 95% Credibility Intervals. Posterior distribution of parameters was calculated using ln-tg transformation and logistic regression on the closest 0.1% simulated datasets. Time ( $t_n$ ) is expressed in number of generations and effective population size ( $N_x$ ) is expressed in number of diploid individuals. Populations codes: SES = Sesia; UNS = unsampled population; ADI = Adige; ISA = Isarco; DRA = Drava.  $r_{\text{UNStoADI}}$ : rate of admixture from population UNS the new admixed population ADI.

| First step            | scenario A           |                      |                      |                      |                      |                      |                      |
|-----------------------|----------------------|----------------------|----------------------|----------------------|----------------------|----------------------|----------------------|
| Parameter             | mean                 | median               | mode                 | q025                 | q050                 | q950                 | q975                 |
| $N_{\text{SES}}$      | 791                  | 821                  | 845                  | 425                  | 507                  | 972                  | 984                  |
| $N_{\text{UNS}}$      | 464                  | 443                  | 197                  | 31                   | 51                   | 936                  | 967                  |
| $N_{\text{ADI}}$      | 642                  | 658                  | 678                  | 215                  | 278                  | 954                  | 977                  |
| $N_{\text{ISA}}$      | 709                  | 730                  | 713                  | 309                  | 379                  | 962                  | 978                  |
| $N_{\text{DRA}}$      | 531                  | 521                  | 487                  | 158                  | 200                  | 905                  | 948                  |
| $t_1$                 | 146                  | 108                  | 58                   | 21                   | 29                   | 348                  | 453                  |
| $t_2$                 | 363                  | 187                  | 93                   | 53                   | 64                   | 911                  | 1,520                |
| $t_3$                 | 17,600               | 7,590                | 3,570                | 2,660                | 2,870                | 70,100               | 117,000              |
| $t_4$                 | 637,000              | 580,000              | 373,000              | 265,000              | 281,000              | 1,160,000            | 1,200,000            |
| $r_{\text{UNStoADI}}$ | 0.681                | 0.717                | 0.767                | 0.217                | 0.314                | 0.906                | 0.933                |
| $\mu_{\text{SSR}}$    | $6.14 \cdot 10^{-4}$ | $6.31 \cdot 10^{-4}$ | $6.51 \cdot 10^{-4}$ | $2.22 \cdot 10^{-4}$ | $3.02 \cdot 10^{-4}$ | $8.76 \cdot 10^{-4}$ | $9.11 \cdot 10^{-4}$ |
| $P_{\text{SSR}}$      | 0.654                | 0.696                | 0.743                | 0.245                | 0.372                | 0.787                | 0.794                |

  

| Second step              | scenario $A_{\text{historical}}$ |                      |                      |                      |                      |                      |                      |
|--------------------------|----------------------------------|----------------------|----------------------|----------------------|----------------------|----------------------|----------------------|
| Parameter                | mean                             | median               | mode                 | q025                 | q050                 | q950                 | q975                 |
| $N_{\text{SES}}$         | 701                              | 719                  | 732                  | 326                  | 397                  | 951                  | 975                  |
| $N_{\text{UNS}}$         | 629                              | 659                  | 835                  | 125                  | 195                  | 959                  | 979                  |
| $N_{\text{ADI}}$         | 461                              | 427                  | 332                  | 82                   | 115                  | 913                  | 953                  |
| $N_{\text{ISA}}$         | 752                              | 777                  | 795                  | 372                  | 447                  | 965                  | 982                  |
| $N_{\text{DRA}}$         | 460                              | 425                  | 337                  | 143                  | 172                  | 867                  | 932                  |
| $t_{1\text{historical}}$ | 43                               | 34                   | 16                   | 3                    | 5                    | 112                  | 132                  |
| $t_{2\text{historical}}$ | 117                              | 116                  | 102                  | 34                   | 43                   | 191                  | 196                  |
| $t_3$                    | 11,400                           | 5,590                | 3,180                | 2,550                | 2,710                | 35,200               | 63,700               |
| $t_4$                    | 706,000                          | 680,000              | 288,000              | 269,000              | 288,000              | 1,190,000            | 1,220,000            |
| $r_{\text{UNStoADI}}$    | 0.814                            | 0.826                | 0.837                | 0.637                | 0.692                | 0.895                | 0.914                |
| $\mu_{\text{SSR}}$       | $5.93 \cdot 10^{-4}$             | $5.95 \cdot 10^{-4}$ | $5.31 \cdot 10^{-4}$ | $2.65 \cdot 10^{-4}$ | $3.13 \cdot 10^{-4}$ | $8.72 \cdot 10^{-4}$ | $9.17 \cdot 10^{-4}$ |
| $P_{\text{SSR}}$         | 0.720                            | 0.748                | 0.770                | 0.460                | 0.559                | 0.794                | 0.797                |

**Fig. S1** Midpoint-rooted Maximum-Likelihood Phylogeny of 83 *T. thymallus* mtDNA CR haplotypes based on the ML algorithm implemented in PhyML v3.0 (Guindon *et al.* 2010) by using best-fit substitution model HKY + I + G (Hasegawa *et al.* 1985) (transition:transversion = 3.2906; proportion of invariable sites (I) = 0.8130; gamma distribution shape parameter (G) = 0.9010) selected by AICc and BIC with jModeltest 2.1.1. (Darriba *et al.* 2012). Haplotypes marked with \* are the ones retrieved in the present dataset. GenBank sequences of *T. grubei*, *T. brevisrostris* and *T. arcticus* served as outgroup taxa. Bootstrap percentages  $\geq 70$  are reported at nodes. Nomenclature of major mtDNA lineages (according to Weiss *et al.* 2002) is included.

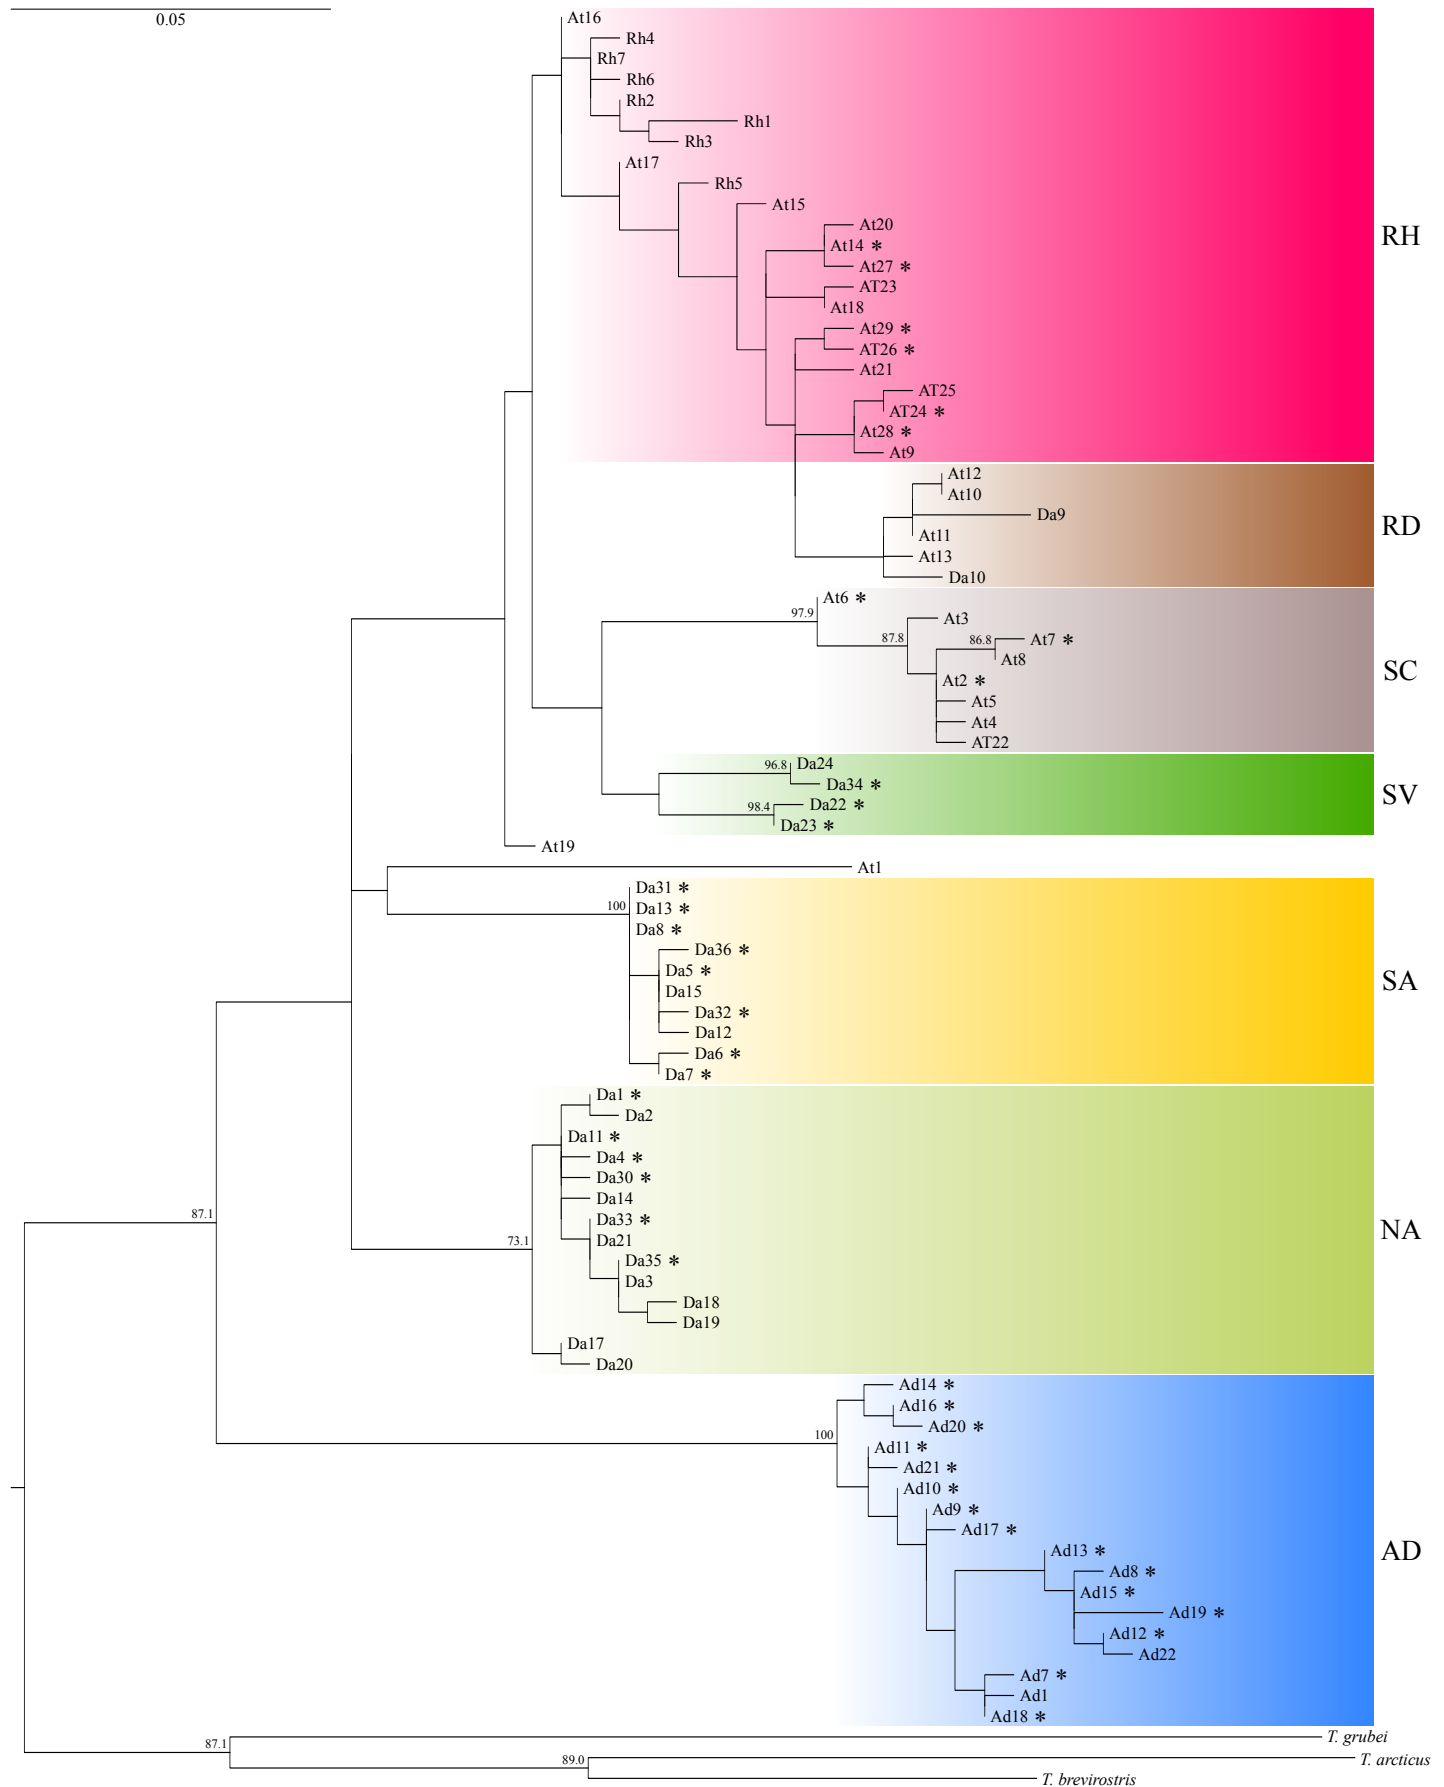

**Fig. S2** Intra-cluster genetic substructure analysis results. For each cluster identified in the first-level STRUCTURE analysis (see Fig. 2), only individuals with a q-value  $\geq 0.90$  for that specific cluster were included in the analysis (qAD1, qAD2, qNA, qRH1, qSA, qSC, qSV; qRH2 was not analysed because it was under-represented in the test-samples and completely absent in the reference-samples). For each cluster, mean of the estimated ln probability of data ( $\pm$  st. dev.) (black dots and lines) and the  $\Delta K$  statistics (Evanno *et al.* 2005; red line) for the different tested number of STRUCTURE genetic clusters (K) are shown on top, for both correlated- and independent allele frequencies models. Population structure for most likely K values, ordered by sampling sites (codes according to IDs in Table 1) are shown below, for both correlated- and independent allele frequencies models. Each vertical bar represents a fish and its proportional membership to one of the genetic clusters inferred by STRUCTURE.

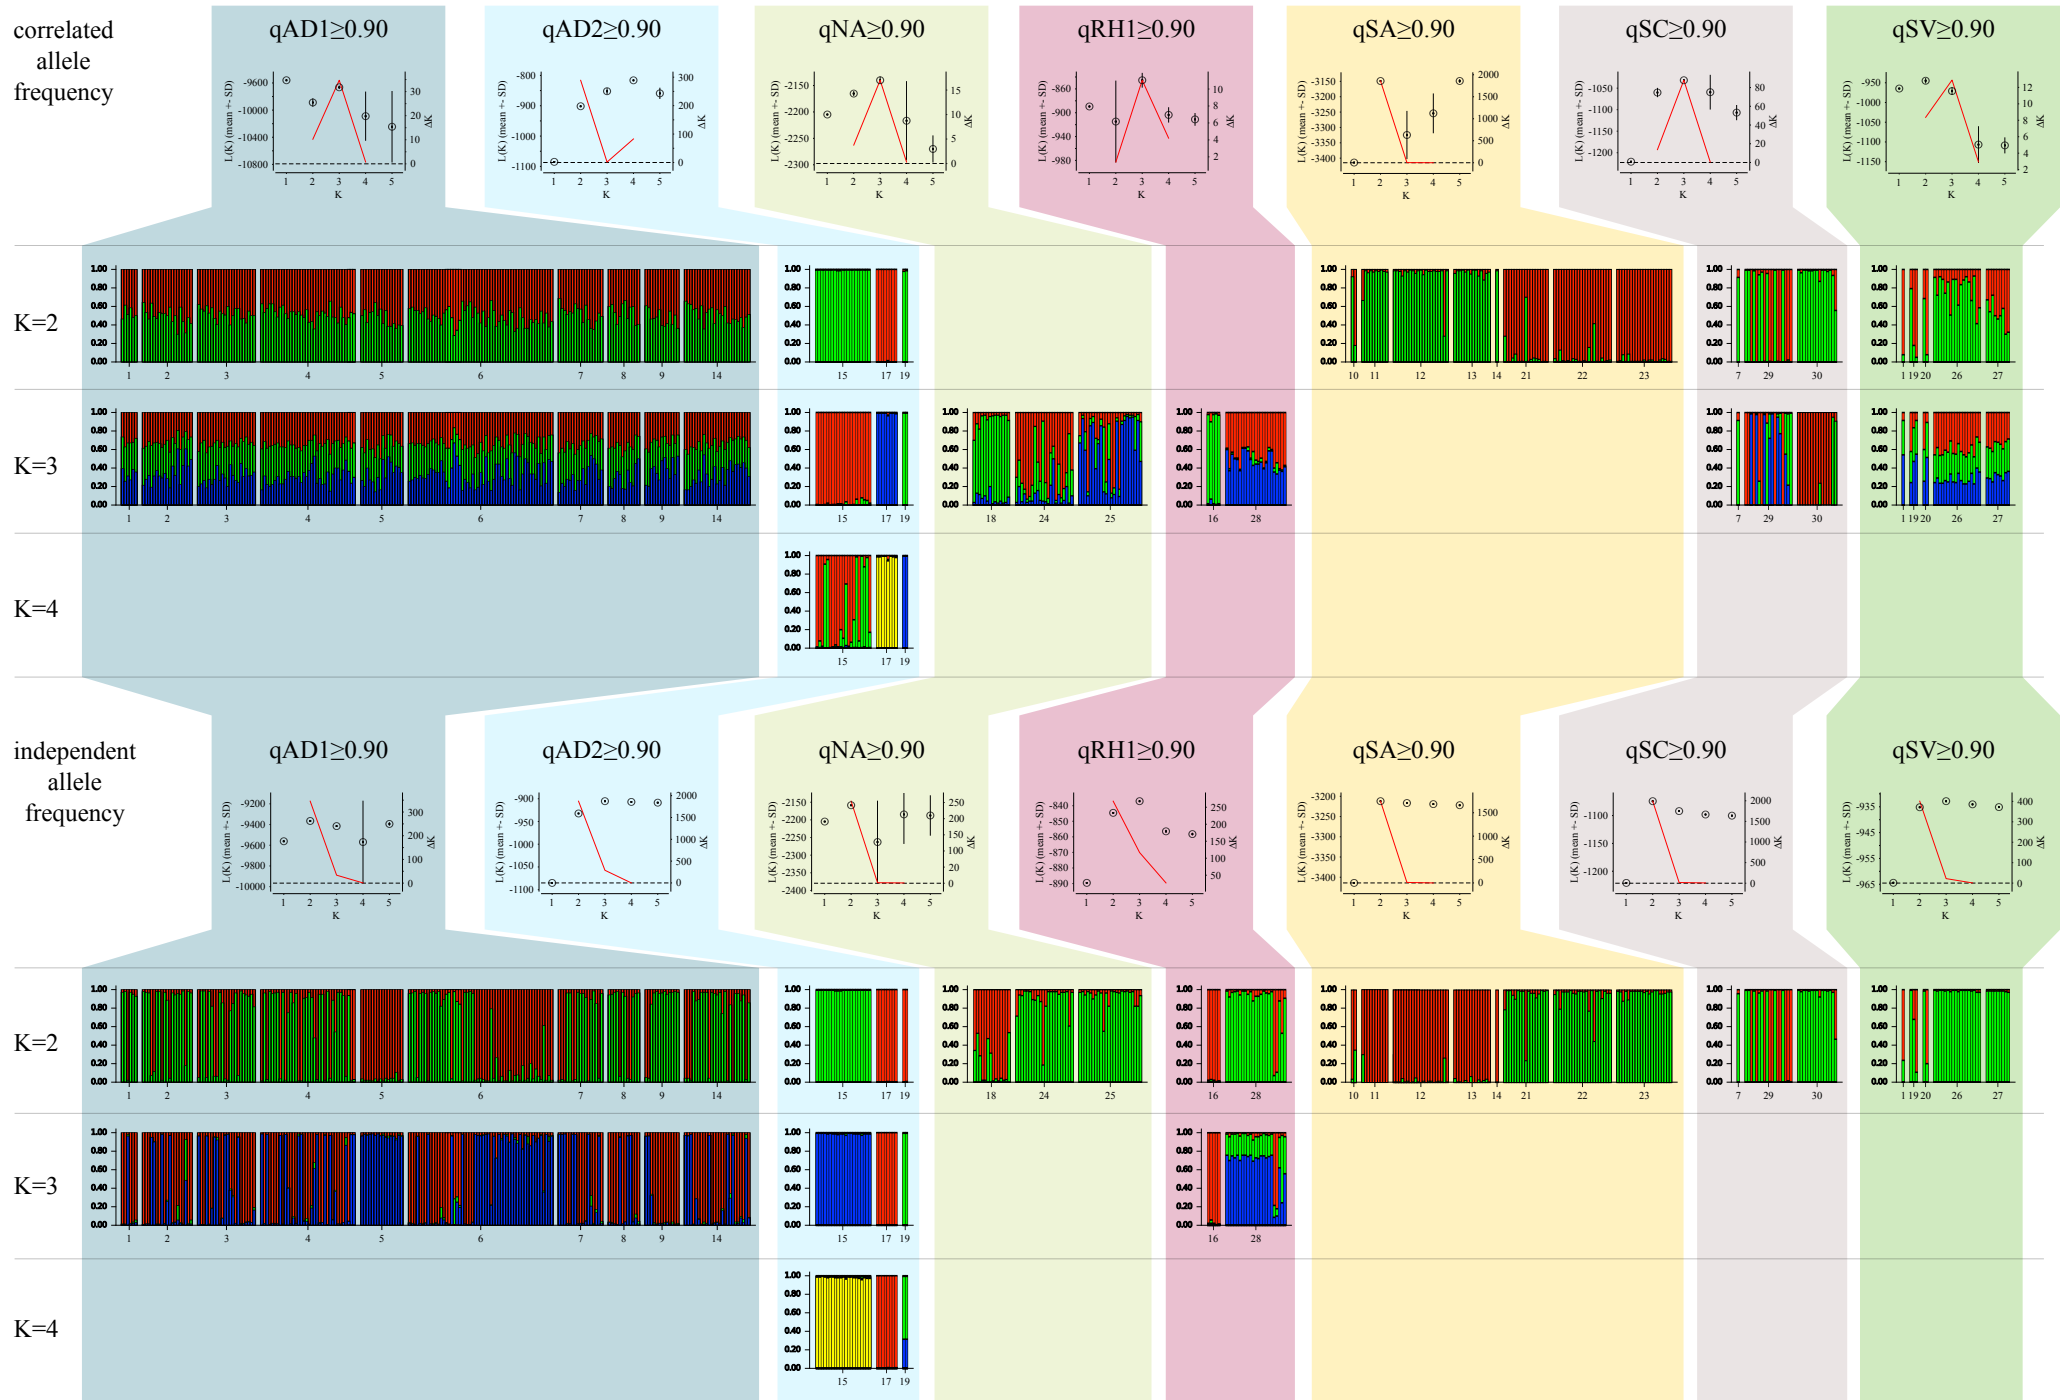

## Supplementary References

- Cornuet JM, Luikart G (1997) Description and power analysis of two tests for detecting recent population bottlenecks from allele frequency data. *Genetics*, **144**, 2001-2014.
- Darriba D, Taboada G, Doallo R, Posada D (2012) jModelTest 2: more models, new heuristics and parallel computing. *Nature Methods*, **9**, 772.
- Evanno G, Regnaut S, Goudet J (2005) Detecting the number of clusters of individuals using the software STRUCTURE: a simulation study. *Molecular Ecology*, **14**, 2611-2620.
- Garza JC, Williamson EG (2001) Detection of reduction in population size using data from microsatellite loci. *Molecular Ecology*, **10**, 305-318.
- Gelman A, Carlin JB, Stern HS, Rubin DB (1995) *Bayesian Data Analysis*. Chapman & Hall, London.
- Goldstein DB, Linares AR, Cavalli-Sforza LL, Feldman MW (1995) Genetic absolute dating based on microsatellites and the origin of modern humans. *Proceedings of the National Academy of Sciences of the United States of America*, **92**, 6723-6727.
- Guindon S, Dufayard JF, Lefort V, Anisimova M, Hordijk W, Gascuel O (2010) New algorithms and methods to estimate maximum-likelihood phylogenies: assessing the performance of PhyML 3.0. *Systematic Biology*, **59**, 307-321.
- Hasegawa M, Kishino H, Yano T (1985) Dating of the human-ape splitting by a molecular clock of mitochondrial DNA. *Journal of Molecular Evolution*, **22**, 160-174.
- Jin L, Chakraborty R (1994) Estimation of genetic distance and coefficient of gene diversity from single-probe multilocus DNA fingerprinting data. *Molecular Biology and Evolution*, **11**, 120-127.
- Nei M (1987) *Molecular Evolutionary Genetics*. Columbia University Press, New York.
- Pascual M, Chapuis MP, Mestres F, Balanya J, Huey RB, Gilchrist GW *et al.* (2007) Introduction history of *Drosophila subobscura* in the New World: a microsatellite-based survey using ABC methods. *Molecular Ecology*, **16**, 3069-3083.
- Wang J (2012) Computationally efficient sibship and parentage assignment from multilocus marker data. *Genetics*, **191**, 183-194.
- Weir BS, Cockerham C (1984) Estimating F-statistics for the analysis of population structure. *Evolution*, **38**, 1358-1370.
